# Supplementary material for: Recognition of quinolone antibiotics by the multidrug efflux transporter MexB ofPseudomonas aeruginosa
Source: Royal Society of Chemistry journal article supplement (doi:10.1039/d2cp00951j), 2022-01-01
Supplement: d2cp00951j1.pdf [file d2cp00951j1.pdf]

## Electronic Supplementary Information (ESI)

### Recognition of quinolone antibiotics by the multidrug efflux transporter MexB of *Pseudomonas aeruginosa*

Silvia Gervasoni,<sup>a</sup> Giuliano Mallocci,<sup>\*a</sup> Andrea Bosin,<sup>a</sup> Attilio V. Vargiu,<sup>a</sup> Helen I. Zgurskaya,<sup>b</sup> and Paolo Ruggerone<sup>a</sup>

---

<sup>0a</sup> Department of Physics, University of Cagliari, Citt. Universitaria, I-09042 Monserrato (Cagliari), Italy. E-mail: giuliano.mallocci@dsf.unica.it

<sup>0b</sup> Department of Chemistry and Biochemistry, University of Oklahoma, Norman, OK 73072, United States.

## Supplementary Tables and Figures

**Table S1** List of 36 FQs simulated in this study – Molecular weights (Da) and net charges are also reported. 11 compounds have been considered in two protonation states.

| Quinolones     | Molecular weight | Net charge |
|----------------|------------------|------------|
| cinoxacin      | 261.2            | -1         |
| ciprofloxacin  | 331.4            | 0 and -1   |
| clinafloxacin  | 365.8            | -1         |
| danofloxacin   | 357.4            | 0          |
| delafloxacin   | 439.8            | -1         |
| difloxacin     | 399.4            | 0 and -1   |
| dx-619         | 401.4            | 0          |
| enoxacin       | 320.3            | 0 and -1   |
| enrofloxacin   | 359.4            | 0 and -1   |
| fleroxacin     | 369.3            | 0 and -1   |
| flumequine     | 260.2            | -1         |
| garenoxacin    | 426.4            | 0          |
| gatifloxacin   | 375.4            | 0          |
| gemifloxacin   | 389.4            | 0          |
| grepafloxacin  | 359.4            | 0          |
| levofloxacin   | 361.4            | 0 and -1   |
| lomefloxacin   | 351.4            | 0 and -1   |
| marbofloxacin  | 361.4            | 0          |
| moxifloxacin   | 401.4            | -1         |
| nadifloxacin   | 359.4            | -1         |
| nalidixic acid | 231.2            | -1         |
| norfloxacin    | 319.3            | 0 and -1   |
| ofloxacin      | 361.4            | 0 and -1   |
| orbifloxacin   | 395.4            | 0          |
| oxolinic acid  | 260.2            | -1         |
| pazufloxacin   | 318.3            | 0          |
| pefloxacin     | 333.4            | 0 and -1   |
| pipemidic acid | 303.3            | 0          |
| prulifloxacin  | 460.5            | 0          |
| rosoxacin      | 293.3            | -1         |
| rufloxacin     | 363.4            | 0          |
| sarafloxacin   | 385.4            | 0 and -1   |
| sitafoxacin    | 409.8            | 0          |
| sparfloxacin   | 392.4            | 0          |
| temafloxacin   | 417.4            | 0          |
| trovafloxacin  | 416.4            | 0          |

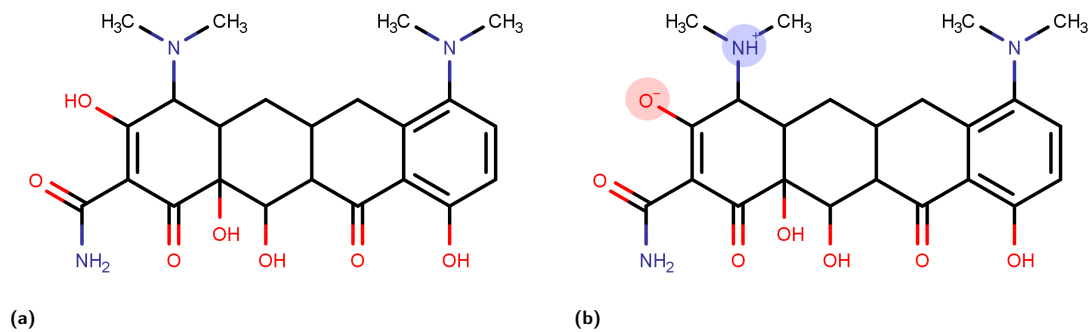

**Figure S1** 2D sketches of minocycline protonation states – (a) Un-ionized and (b) zwitterionic.

**Table S2** Redocking results – Poses with an RMSD value (Å, in parenthesis) with respect to the corresponding crystal structure below 2.5 Å are highlighted (blue, orange and green for VINA, AD4 and GNINA, respectively). The affinity score (kcal/mol) is reported for VINA and AD4, while the CNN score (adimensional quantity) is given for GNINA. When the programs were not able to produce a docking pose, we inserted the value "NA".

|                    | VINA         |              |              |              | AD4          |              |              |              | GNINA      |            |            |            |
|--------------------|--------------|--------------|--------------|--------------|--------------|--------------|--------------|--------------|------------|------------|------------|------------|
|                    | EX-64        | EX-128       | EX-512       | EX-1024      | EX-64        | EX-128       | EX-512       | EX-1024      | EX-64      | EX-128     | EX-512     | EX-1024    |
| MexB - ABI-PP      |              |              |              |              |              |              |              |              |            |            |            |            |
| 1                  | -12.9 (2.2)  | -13.3 (2.2)  | -13.1 (2.1)  | -13.8 (2.1)  | -10.6 (4.2)  | -10.7 (4.2)  | -10.7 (4.1)  | -10.7 (4.2)  | 0.9 (1.1)  | 0.9 (0.8)  | 0.9 (0.8)  | 0.9 (0.9)  |
| 2                  | -11.8 (3.4)  | -13.0 (0.9)  | -12.8 (0.7)  | -13.5 (0.7)  | -10.6 (1.0)  | -10.6 (1.0)  | -10.6 (1.0)  | -10.6 (1.0)  | 0.8 (2.1)  | 0.8 (2.0)  | 0.8 (2.0)  | 0.8 (2.1)  |
| 3                  | -11.4 (4.4)  | -12.2 (3.5)  | -12.0 (3.5)  | -12.7 (3.5)  | -10.5 (11.9) | -10.4 (12.0) | -10.4 (12.0) | -10.4 (12.0) | 0.6 (6.2)  | 0.5 (12.9) | 0.5 (12.9) | 0.5 (12.9) |
| 4                  | -11.3 (3.2)  | -11.8 (4.4)  | -11.7 (4.3)  | -12.3 (4.3)  | -10.5 (12.7) | -9.9 (4.6)   | -9.9 (4.6)   | -9.9 (4.6)   | 0.5 (12.9) | 0.4 (4.1)  | 0.4 (4.1)  | 0.4 (4.1)  |
| 5                  | -11.0 (4.4)  | -11.5 (4.5)  | -11.4 (4.5)  | -12.0 (4.5)  | -9.9 (4.6)   | -9.6 (1.8)   | -9.6 (1.7)   | -9.8 (16.4)  | 0.4 (4.0)  | 0.4 (12.3) | 0.4 (12.3) | 0.4 (4.3)  |
| 6                  | -10.9 (2.8)  | -11.2 (2.8)  | -11.1 (2.8)  | -12.0 (3.0)  | -9.7 (4.4)   | -9.6 (4.3)   | -9.5 (4.4)   | -9.6 (4.5)   | 0.4 (4.3)  | 0.4 (4.5)  | 0.3 (4.5)  | 0.4 (3.5)  |
| 7                  | -10.8 (11.9) | -11.1 (11.9) | -11.0 (11.9) | -11.7 (2.8)  | -9.1 (2.1)   | -8.9 (11.8)  | -8.9 (11.8)  | -8.4 (4.2)   | 0.4 (12.3) | 0.3 (3.5)  | 0.3 (3.5)  | 0.3 (12.6) |
| 8                  | -10.7 (10.3) | -11.1 (10.3) | -11.0 (10.3) | -11.7 (11.9) | -8.9 (11.8)  | -8.4 (4.3)   | -8.4 (4.3)   | -8.4 (12.4)  | 0.4 (3.5)  | 0.3 (12.6) | 0.3 (12.6) | 0.3 (4.2)  |
| 9                  | -10.6 (15.8) | -10.9 (15.7) | -10.9 (15.7) | -11.6 (10.3) | -8.3 (4.3)   | -8.4 (12.4)  | -8.3 (12.4)  | -8.0 (4.9)   | 0.3 (12.6) | 0.3 (11.2) | 0.3 (11.2) | 0.3 (11.2) |
| 10                 | -10.5 (15.7) | -10.8 (15.6) | NA           | NA           | -8.1 (4.5)   | -8.0 (4.9)   | -8.2 (4.7)   | NA           | 0.3 (2.6)  | 0.3 (13.9) | 0.3 (13.9) | 0.3 (4.3)  |
| AcrB - LFX (0)     |              |              |              |              |              |              |              |              |            |            |            |            |
| 1                  | -8.5 (1.7)   | -8.8 (1.6)   | -8.8 (1.6)   | -8.6 (1.6)   | -7.6 (6.9)   | -7.6 (6.9)   | -7.6 (6.9)   | -7.6 (6.9)   | 0.9 (0.6)  | 0.9 (1.6)  | 0.9 (1.6)  | 0.9 (1.6)  |
| 2                  | -8.4 (0.6)   | -8.7 (3.4)   | -8.7 (0.6)   | -8.4 (0.6)   | -7.5 (1.9)   | -7.5 (1.9)   | -7.5 (1.9)   | -7.5 (1.9)   | 0.9 (1.6)  | 0.9 (0.6)  | 0.9 (0.6)  | 0.9 (0.6)  |
| 3                  | -8.4 (3.4)   | -8.7 (0.6)   | -8.7 (3.4)   | -8.4 (3.4)   | -7.4 (3.6)   | -7.4 (3.6)   | -7.4 (3.6)   | -7.4 (3.6)   | 0.8 (1.7)  | 0.8 (1.7)  | 0.8 (1.7)  | 0.8 (1.7)  |
| 4                  | -8.1 (6.9)   | -8.5 (6.9)   | -8.5 (6.9)   | -8.3 (6.9)   | -7.2 (7.2)   | -7.2 (1.6)   | -7.3 (7.0)   | -7.2 (4.2)   | 0.7 (2.2)  | 0.7 (3.7)  | 0.7 (3.7)  | 0.7 (3.7)  |
| 5                  | -8.0 (1.7)   | -8.3 (1.8)   | -8.3 (1.6)   | -8.0 (1.7)   | -7.2 (1.6)   | -7.1 (5.9)   | -7.2 (4.2)   | -7.2 (1.4)   | 0.7 (3.4)  | 0.7 (3.4)  | 0.7 (3.4)  | 0.7 (3.4)  |
| 6                  | -8.0 (7.5)   | -8.3 (7.5)   | -8.3 (7.5)   | -8.0 (7.5)   | -7.1 (5.9)   | -7.1 (7.5)   | -7.1 (5.9)   | -7.1 (5.9)   | 0.6 (2.7)  | 0.6 (2.7)  | 0.6 (2.7)  | 0.6 (3.7)  |
| 7                  | -7.9 (8.0)   | -8.2 (18.2)  | -8.2 (18.2)  | -7.9 (18.2)  | -7.1 (7.5)   | -7.1 (13.2)  | -7.1 (7.3)   | -7.1 (7.5)   | 0.5 (3.5)  | 0.5 (3.5)  | 0.5 (3.4)  | 0.6 (2.6)  |
| 8                  | -7.8 (18.2)  | -8.1 (8.1)   | -8.1 (8.0)   | -7.8 (8.0)   | -7 (3.9)     | -7.1 (4.0)   | -7.1 (7.5)   | -7.1 (13.4)  | 0.4 (6.9)  | 0.5 (3.7)  | 0.5 (3.7)  | 0.5 (3.5)  |
| 9                  | -7.4 (3.5)   | -8.0 (2.6)   | -8 (7.7)     | -7.7 (7.7)   | -7 (13.3)    | -7.0 (3.5)   | -7.1 (13.3)  | -7.1 (4.0)   | 0.4 (7.0)  | 0.5 (3.8)  | 0.4 (3.8)  | 0.4 (6.9)  |
| 10                 | -7.2 (18.5)  | -7.7 (3.5)   | -7.7 (3.5)   | -7.7 (2.6)   | -7.5 (6.6)   | NA           | -7.0 (4.0)   | NA           | 0.4 (4.5)  | 0.4 (6.9)  | 0.4 (6.9)  | 0.4 (7.0)  |
| AcrB - LFX (-1)    |              |              |              |              |              |              |              |              |            |            |            |            |
| 1                  | -8.9 (1.6)   | -8.6 (1.6)   | -8.8 (1.6)   | -8.9 (1.6)   | -7.6 (6.9)   | -7.6 (6.9)   | -7.6 (6.9)   | -7.6 (6.9)   | 0.9 (1.6)  | 0.9 (1.6)  | 0.9 (1.6)  | 0.9 (1.6)  |
| 2                  | -8.7 (3.4)   | -8.4 (0.6)   | -8.6 (0.6)   | -8.7 (0.6)   | -7.5 (1.9)   | -7.5 (1.9)   | -7.5 (3.6)   | -7.5 (3.6)   | 0.9 (0.6)  | 0.9 (0.6)  | 0.9 (0.6)  | 0.9 (0.6)  |
| 3                  | -8.5 (6.9)   | -8.4 (3.4)   | -8.6 (3.4)   | -8.7 (3.4)   | -7.5 (3.6)   | -7.5 (3.6)   | -7.5 (1.9)   | -7.5 (1.9)   | 0.9 (1.6)  | 0.9 (1.7)  | 0.9 (1.8)  | 0.9 (1.8)  |
| 4                  | -8.3 (1.6)   | -8.2 (6.9)   | -8.4 (6.9)   | -8.5 (6.9)   | -7.3 (3.5)   | -7.3 (7.2)   | -7.3 (7.2)   | -7.3 (7.2)   | 0.7 (3.6)  | 0.7 (3.7)  | 0.7 (3.7)  | 0.7 (3.7)  |
| 5                  | -8.3 (7.5)   | -8.1 (1.7)   | -8.3 (1.7)   | -8.3 (1.7)   | -7.3 (7.2)   | -7.2 (7.5)   | -7.3 (1.6)   | -7.2 (7.5)   | 0.6 (2.5)  | 0.7 (3.4)  | 0.7 (3.6)  | 0.7 (3.4)  |
| 6                  | -8.1 (18.2)  | -8.0 (7.5)   | -8.2 (7.5)   | -8.3 (7.5)   | -7.2 (7.5)   | -7.1 (5.9)   | -7.2 (7.5)   | -7.2 (5.9)   | 0.6 (3.5)  | 0.6 (2.7)  | 0.6 (2.5)  | 0.7 (3.9)  |
| 7                  | -8.1 (8.1)   | -7.9 (18.2)  | -8.1 (18.2)  | -8.1 (18.2)  | -7.1 (5.9)   | -7.1 (5.4)   | -7.2 (5.9)   | -7.1 (4.0)   | 0.5 (7.0)  | 0.6 (3.5)  | 0.6 (3.5)  | 0.6 (3.5)  |
| 8                  | -8.0 (7.7)   | -7.8 (8.0)   | -8.1 (8.1)   | -8.1 (8.1)   | -7.1 (4.0)   | -7.1 (4.0)   | -7.1 (5.6)   | -7.1 (5.6)   | 0.5 (6.9)  | 0.5 (7.0)  | 0.5 (7.0)  | 0.6 (2.5)  |
| 9                  | -7.9 (2.8)   | -7.4 (3.5)   | -7.9 (7.7)   | -8.0 (7.7)   | -7.1 (5.6)   | -7.0 (3.5)   | -7.1 (4.0)   | -7.0 (3.4)   | 0.4 (4.5)  | 0.5 (6.9)  | 0.5 (6.9)  | 0.6 (2.3)  |
| 1                  | -7.7 (3.5)   | -7.3 (18.5)  | -7.7 (3.5)   | -7.7 (3.5)   | -7.0 (3.5)   | -6.9 (5.2)   | -6.9 (5.3)   | -6.9 (5.3)   | 0.3 (7.3)  | 0.4 (4.5)  | 0.4 (4.5)  | 0.6 (3.5)  |
| AcrB - Minocycline |              |              |              |              |              |              |              |              |            |            |            |            |
| 1                  | -9.6 (6.2)   | -9.6 (6.2)   | -9.6 (6.2)   | -9.8 (6.2)   | -10.1 (14.7) | -10.1 (14.7) | -10.1 (14.7) | -10.1 (14.7) | 0.8 (1.1)  | 0.8 (1.2)  | 0.8 (3.8)  | 0.8 (3.7)  |
| 2                  | -9.1 (1.1)   | -9.1 (1.1)   | -9.1 (1.2)   | -9.4 (1.2)   | -9.7 (10.4)  | -9.7 (10.4)  | -9.7 (10.4)  | -9.7 (10.4)  | 0.8 (4.6)  | 0.8 (19.3) | 0.8 (2.5)  | 0.8 (1.1)  |
| 3                  | -8.9 (5.4)   | -8.9 (5.4)   | -8.8 (5.4)   | -9.1 (5.4)   | -9.6 (13.9)  | -9.6 (13.9)  | -9.6 (13.9)  | -9.6 (13.9)  | 0.8 (2.7)  | 0.8 (3.7)  | 0.8 (1.1)  | 0.8 (3.5)  |
| 4                  | -8.6 (3.5)   | -8.6 (3.6)   | -8.5 (3.8)   | -8.8 (3.6)   | -9.4 (11.3)  | -9.4 (11.3)  | -9.4 (11.3)  | -9.4 (11.3)  | 0.8 (1.6)  | 0.8 (1.7)  | 0.8 (1.3)  | 0.8 (1.3)  |
| 5                  | -8.4 (3.6)   | -8.4 (3.7)   | -8.4 (4.1)   | -8.7 (4.1)   | -9.3 (2.0)   | -9.4 (2.0)   | -9.3 (2.0)   | -9.4 (2.1)   | 0.8 (3.7)  | 0.8 (1.3)  | 0.8 (3.8)  | 0.8 (2.2)  |
| 6                  | -8.4 (4.9)   | -8.2 (13.8)  | -8.2 (13.8)  | -8.4 (13.7)  | -9.1 (15.9)  | -9.0 (14.5)  | -9.0 (14.6)  | -9.2 (15.9)  | 0.6 (6.3)  | 0.8 (1.7)  | 0.8 (2.8)  | 0.7 (4.8)  |
| 7                  | -8.2 (13.7)  | -8.1 (10.1)  | -8.1 (13.7)  | NA           | -9.0 (14.5)  | -8.9 (13.3)  | -9.0 (14.3)  | -9.0 (14.6)  | 0.6 (5.3)  | 0.7 (3.0)  | 0.7 (4.9)  | 0.7 (6.3)  |
| 8                  | -8.2 (10.1)  | -8.1 (13.7)  | NA           | NA           | -9.0 (14.3)  | -8.9 (14.3)  | -8.9 (13.3)  | -8.9 (14.3)  | 0.6 (2.2)  | 0.7 (5.6)  | 0.6 (6.3)  | 0.6 (5.7)  |
| 9                  | -8.1 (13.7)  | NA           | NA           | NA           | -8.9 (13.3)  | -8.8 (11.1)  | -8.8 (15.9)  | -8.9 (13.3)  | 0.5 (11.0) | 0.6 (6.3)  | 0.6 (2.2)  | 0.6 (5.2)  |
| 10                 | NA           | NA           | NA           | NA           | -8.4 (11.7)  | -8.4 (11.8)  | -8.8 (11.3)  | -8.9 (11.2)  | 0.5 (17.1) | 0.6 (5.2)  | 0.6 (5.3)  | 0.6 (5.1)  |

**Table S3** Settings for ensemble docking used in this work. A total of 1800 docking poses (600 + 600 + 600) were generated for each FQ.

|                             | VINA 1.2.3                                 | VINA 1.2.3 | GNINA     |
|-----------------------------|--------------------------------------------|------------|-----------|
| Scoring function            | VINA                                       | AutoDock4  | CNN score |
| Box dimension               | 30x30x30 Å <sup>3</sup>                    |            |           |
| Box center                  | Center of Mass of the DP <sub>T</sub>      |            |           |
| Exhaustiveness              | 128                                        |            |           |
| Poses per run               | 10                                         | 10         | 10        |
| Number of MexB structures   | 6 (3 X-ray + 3 MD snapshots <sup>a</sup> ) |            |           |
| Number of FQs conformations | 10 from MD simulations <sup>b</sup>        |            |           |
| Total poses per FQ          | 600                                        | 600        | 600       |

<sup>a</sup> V. K. Ramaswamy et al. Front. Microbiol., 2018, 9, 1144.

<sup>b</sup> S. Gervasoni et al. Sci. Data, 2022, 9, 148.

**Table S4** Ligand RMSD (Å) between crystal structures and the input docking conformations – Minocycline is considered in the zwitterionic state. The population of each cluster is reported in parenthesis (%).

| cluster | MexB-ABI-PP (3W9J) | AcrB-LFX (-1) (7B8T) | AcrB-LFX (0) (7B8T) | AcrB-Minocycline (4DX5) |
|---------|--------------------|----------------------|---------------------|-------------------------|
| 0       | 3.3 (69.6)         | 0.7 (44.9)           | 0.6 (72.1)          | 0.9 (83.5)              |
| 1       | 2.3 (15.4)         | 0.6 (36.5)           | 0.8 (12.9)          | 0.7 (9.0)               |
| 2       | 2.0 (6.9)          | 0.9 (6.1)            | 0.5 (9.1)           | 0.8 (3.6)               |
| 3       | 2.6 (3.3)          | 0.7 (4.6)            | 0.5 (2.1)           | 1.1 (1.2)               |
| 4       | 3.8 (1.5)          | 1.0 (3.0)            | 1.0 (1.7)           | 0.6 (1.1)               |
| 5       | 3.4 (1.3)          | 1.0 (2.1)            | 0.7 (0.7)           | 1.0 (1.0)               |
| 6       | 2.7 (0.7)          | 0.8 (2.0)            | 0.6 (0.36)          | 0.8 (0.2)               |
| 7       | 3.1 (0.5)          | 0.7 (0.7)            | 0.7 (0.4)           | 1.0 (0.2)               |
| 8       | 3.4 (0.4)          | 1.0 (0.1)            | 0.9 (0.3)           | 0.9 (0.2)               |
| 9       | 2.7 (0.3)          | 0.7 (0.1)            | 0.9 (0.3)           | 0.9 (0.1)               |

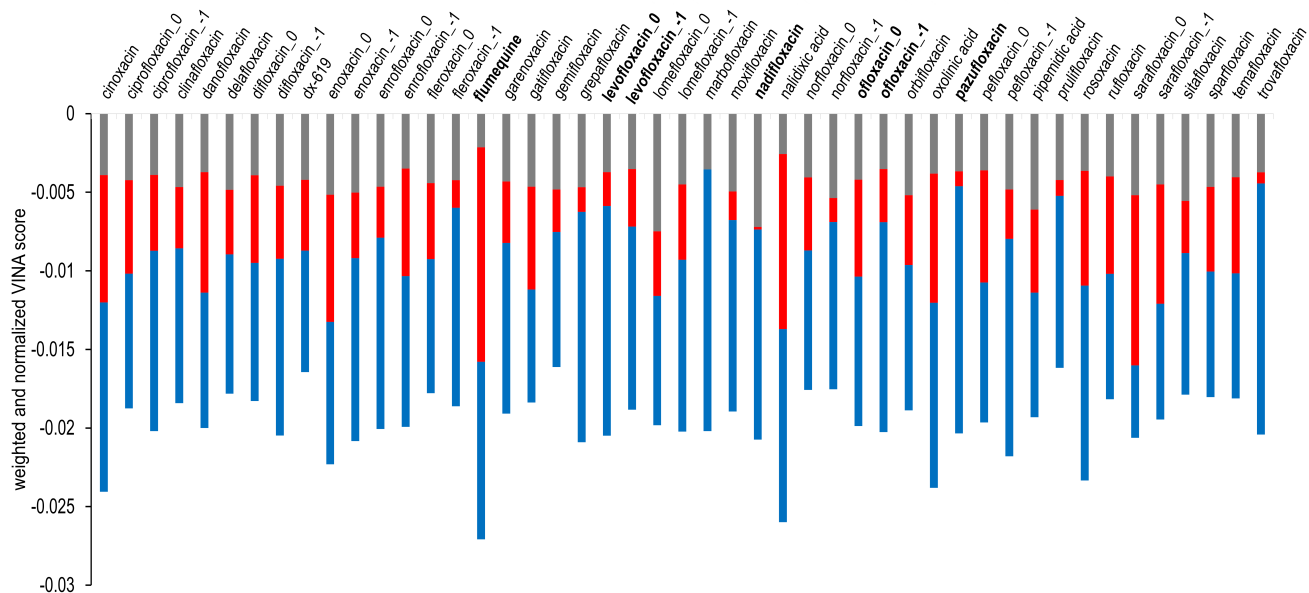

**Figure S2** Sub-region distribution of the VINA affinity score, weighted on the cluster population and normalized to the molecular weight – Gray bars refer to the Interface, red to the Cave, blue to the Groove. FQs are in ascending order according to the molecular weight. FQs containing the piperazine group are reported in two net charges (i.e., 0 and -1). LFX and related compounds are highlighted in boldface.

## Surface-matching analysis with PLATINUM

In our calculations we selected the Fermi-like function:

$$d(r_{ij}) = \frac{[1 + e^{\alpha r_{ij} - c}]^{-1}}{\sum_{k=1}^N [1 + e^{\alpha r_{ik} - c}]^{-1}} \quad (1)$$

where  $\alpha = 1 \text{ \AA}^{-1}$ , and  $c$  is a cutoff, usually set to  $4 \text{ \AA}$ . The atomic hydrophobicity constants are derived from octanol-water log P values for different organic compounds and automatically assigned according to the molecular topology. Positive and negative MHP values correspond respectively to hydrophobic and hydrophilic surface regions. The comparison of MHPs on the interfacial surface gives an understanding of the complementarity of the ligand to binding site of the receptor, in terms of hydrophobic and hydrophilic matching. Specifically, the complementarity between MexB and the FQs is estimated by the fraction of matching of total area, projected for both partners onto the Connolly surface of the molecule, and calculated as:

$$SM_{TOT} = \frac{(S_{LL} + S_{HH})}{S_{LL} + S_{LH} + S_{HL} + S_{HH} + S_{LW} + S_{HW}} \quad (2)$$

where  $S_{LL}$  and  $S_{HH}$  are the area of the match surface between the molecule and receptor hydrophobic and hydrophilic portions, respectively.  $S_{LH}$  is the area of surface match between the hydrophobic portion of the molecule and the hydrophilic portion of the receptor, conversely  $S_{HL}$  is the area of the match surface between the molecule hydrophilic portion and the hydrophobic portion of the receptor.  $S_{LW}$  is the area of surface match between the hydrophobic portion of the molecule and the solvent, and  $S_{HW}$  is the area of the match surface between the hydrophilic portion of the molecule and the solvent. The hydrophobic surface matching coefficient ( $SM_L$ ) was computed as follows:

$$SM_L = \frac{2S_{LL}}{2S_{LL} + S_{HL} + S_{LH} + S_{LW}} \quad (3)$$

$SM_{TOT}$  and  $SM_L$  are positive adimensional quantities ranging from 0 (no surface matching between molecule and receptor) and 1 (complete surface matching).
